# Supplementary material
Source: PubMed Central journal article supplement (PMC10481231)
Supplement: jama-e2314330-s002.pdf [file jama-e2314330-s002.pdf]

## Supplemental Online Content

Mistry EA, Hart KW, Davis LT, et al. Blood pressure management after endovascular therapy for acute ischemic stroke: the BEST-II randomized clinical trial *JAMA*. doi:10.1001/jama.2023.14330

**eFigure 1.** Scatter/Violin plot showing distribution of raw final infarct volume(A) and utility-weighted modified Rankin score (B) by the randomization group

**eFigure 2.** Multiple Primary Outcome Results

**eTable 1.** Baseline Characteristics by Site

**eTable 2.** Details of post-endovascular treatment blood pressure management

**eTable 3.** BP target modification information

**eTable 4.** Details of missing outcome data

**eTable 5.** Details of hemorrhage grade by randomization group

**eTable 6.** Details of serious adverse events (SAE)

**eTable 7.** Subgroup analyses

**eTable 8.** Predicted Probabilities of Success for Future Trials Comparing <140 vs <=180 mmHg and <160 vs <=180 Arms

eStatistical models

This supplemental material has been provided by the authors to give readers additional information about their work.

**eFigure 1. Scatter plot showing distribution of raw final infarct volume(A) and utility-weighted modified Rankin score (B) by the randomization group**

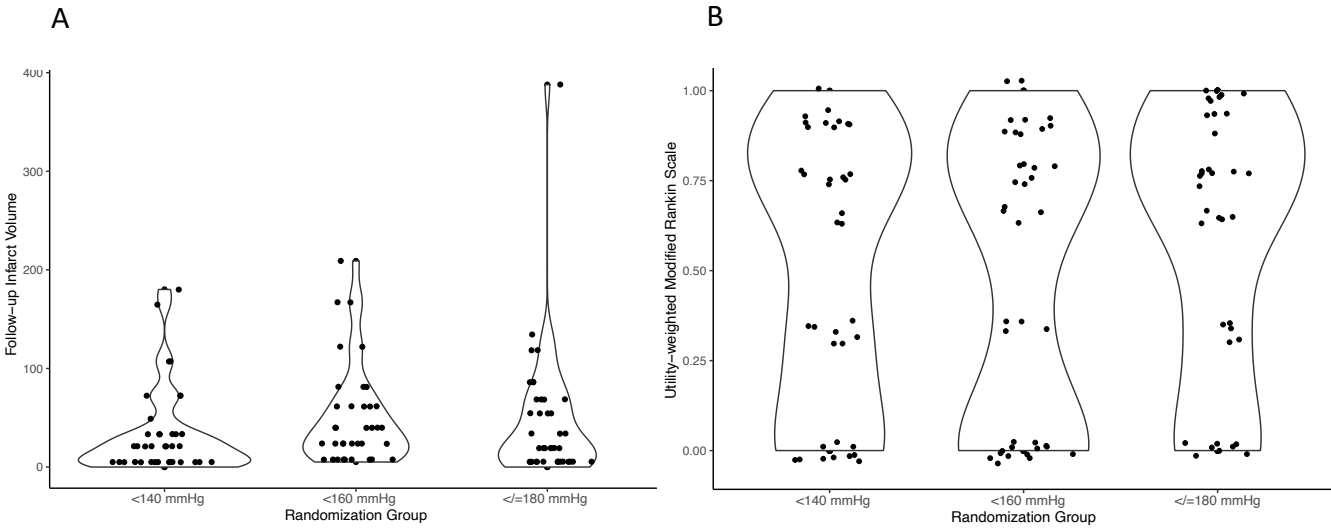

eFigure 2. Multiple Primary Outcome Results

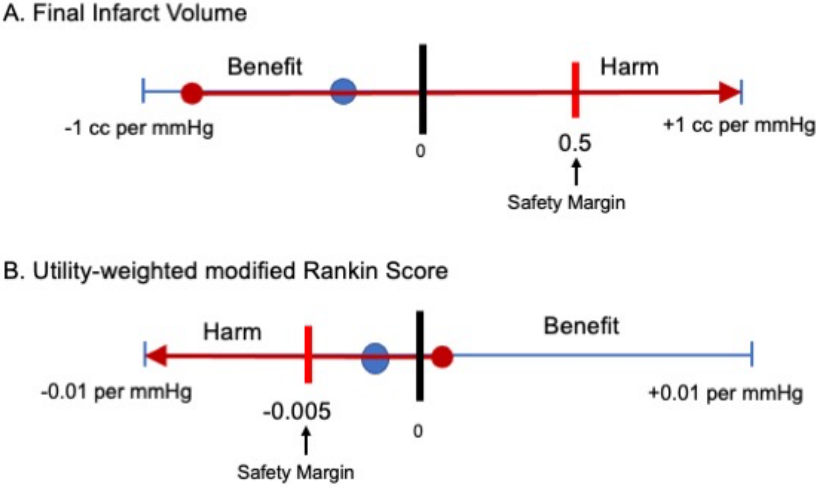

The slope of association between post-endovascular treatment systolic blood pressure target and final infarct volume is shown in A. The point estimate of treatment effect is shown (Blue dot) with one-sided 95% confidence interval. Because the confidence interval is not all to the right of the safety margin, the results do not support a finding of futility. The slope of association between post-endovascular treatment systolic blood pressure target and utility-weighted modified Rankin score is shown in B. The point estimate of treatment effect is shown (Blue dot) with one-sided 95% confidence interval. Because the confidence interval is not all to the left of the safety margin, the results do not support a finding of futility.

| <b>eTable 1. Baseline Characteristics by Site</b>                       |                   |                   |                   |                   |
|-------------------------------------------------------------------------|-------------------|-------------------|-------------------|-------------------|
|                                                                         | Site 1<br>(N=46)  | Site 2<br>(N=6)   | Site 3<br>(N=68)  | Total<br>(N=120)  |
| Age in years                                                            | 69.0 [62.0, 84.0] | 71.0 [69.5, 73.3] | 72.0 [62.8, 77.0] | 71.0 [62.8, 77.0] |
| Female                                                                  | 30 (65.2%)        | 3 (50.0%)         | 36 (52.9%)        | 69 (57.5%)        |
| Male                                                                    | 16 (34.8%)        | 3 (50.0%)         | 31 (45.6%)        | 50 (41.7%)        |
| Race                                                                    |                   |                   |                   |                   |
| Multi-racial                                                            | 2 (4.3%)          | 0 (0%)            | 1 (1.5%)          | 3 (2.5%)          |
| Black or African American                                               | 3 (6.5%)          | 0 (0%)            | 6 (8.8%)          | 9 (7.5%)          |
| Native Hawaiian or Other Pacific Islander                               | 1 (2.2%)          | 0 (0%)            | 0 (0%)            | 1 (0.8%)          |
| White or Caucasian                                                      | 38 (82.6%)        | 6 (100%)          | 61 (89.7%)        | 105 (87.5%)       |
| Other                                                                   | 2 (4.3%)          | 0 (0%)            | 0 (0%)            | 2 (1.7%)          |
| Ethnicity                                                               |                   |                   |                   |                   |
| Hispanic or Latino                                                      | 1 (2.2%)          | 0 (0%)            | 1 (1.5%)          | 2 (1.7%)          |
| Not Hispanic or Latino                                                  | 45 (97.8%)        | 6 (100%)          | 63 (92.6%)        | 114 (95.0%)       |
| Unknown                                                                 | 0 (0%)            | 0 (0%)            | 4 (5.9%)          | 4 (3.3%)          |
| Hypertension (%)                                                        | 34 (73.9%)        | 5 (83.3%)         | 53 (77.9%)        | 92 (76.7%)        |
| Diabetes (%)                                                            | 16 (34.8%)        | 2 (33.3%)         | 22 (32.4%)        | 40 (33.3%)        |
| Hyperlipidemia (%)                                                      | 33 (71.7%)        | 4 (66.7%)         | 58 (85.3%)        | 95 (79.2%)        |
| Atrial fibrillation (%)                                                 | 23 (50.0%)        | 4 (66.7%)         | 26 (38.2%)        | 53 (44.2%)        |
| Time from last known well to the presentation (minute; Median [Q1, Q3]) | 212 [119, 417]    | 287 [198, 354]    | 231 [130, 446]    | 225 [126, 443]    |
| Pre-stroke modified Rankin score (Median [Q1, Q3])                      | 0 [0, 2.00]       | 0 [0, 0]          | 0 [0, 1.00]       | 0 [0, 1.00]       |
| Baseline antiplatelet use (%)                                           | 16 (34.8%)        | 0 (0%)            | 30 (44.1%)        | 46 (38.3%)        |
| Baseline anticoagulant use (%)                                          | 9 (19.6%)         | 2 (33.3%)         | 11 (16.2%)        | 22 (18.3%)        |
| Intravenous thrombolysis administered (%)                               | 17 (37.0%)        | 3 (50.0%)         | 34 (50.0%)        | 54 (45.0%)        |
| Baseline glucose (Median [Q1, Q3])                                      | 120 [108, 148]    | 124 [101, 163]    | 120 [107, 150]    | 120 [107, 149]    |
| Baseline platelet count (Median [Q1, Q3])                               | 218 [187, 263]    | 212 [177, 342]    | 226 [181, 269]    | 225 [184, 269]    |
| Baseline NIHSS (Median [Q1, Q3])                                        | 16.0 [12.0, 22.0] | 10.0 [7.50, 14.8] | 16.0 [11.0, 23.0] | 16.0 [11.0, 22.0] |
| Baseline ASPECT score (Median [Q1, Q3])                                 | 9.00 [7.25, 9.00] | 8.00 [8.00, 9.50] | 7.00 [6.00, 8.00] | 8.00 [7.00, 9.00] |
| Location of the vessel occlusion                                        |                   |                   |                   |                   |
| ICA                                                                     | 7 (15.2%)         | 0 (0%)            | 14 (20.6%)        | 21 (17.5%)        |
| M1                                                                      | 28 (60.9%)        | 6 (100%)          | 45 (66.2%)        | 79 (65.8%)        |
| M2                                                                      | 14 (30.4%)        | 1 (16.7%)         | 14 (20.6%)        | 29 (24.2%)        |
| Modified Tan score on baseline CTA                                      |                   |                   |                   |                   |
| 0                                                                       | 0 (0%)            | 0 (0%)            | 3 (4.4%)          | 3 (2.5%)          |

|                                                          |             |             |             |             |
|----------------------------------------------------------|-------------|-------------|-------------|-------------|
| 1                                                        | 10 (21.7%)  | 1 (16.7%)   | 23 (33.8%)  | 34 (28.3%)  |
| 2                                                        | 23 (50.0%)  | 1 (16.7%)   | 28 (41.2%)  | 52 (43.3%)  |
| 3                                                        | 7 (15.2%)   | 3 (50.0%)   | 9 (13.2%)   | 19 (15.8%)  |
| Final recanalization grade                               |             |             |             |             |
| mTICI2b                                                  | 12 (26.1%)  | 1 (16.7%)   | 37 (54.4%)  | 50 (41.7%)  |
| mTICI 2c                                                 | 5 (10.9%)   | 1 (16.7%)   | 12 (17.6%)  | 18 (15.0%)  |
| mTICI 3                                                  | 29 (63.0%)  | 4 (66.7%)   | 19 (27.9%)  | 52 (43.3%)  |
| Type of anesthesia used                                  |             |             |             |             |
| General                                                  | 2 (4.3%)    | 2 (33.3%)   | 19 (27.9%)  | 23 (19.2%)  |
| Conscious Sedation                                       | 33 (71.7%)  | 0 (0%)      | 48 (70.6%)  | 81 (67.5%)  |
| Last systolic BP prior to groin puncture (Mean with SD)  | 148 (23.1)  | 140 (30.3)  | 150 (23.4)  | 149 (23.5)  |
| Last diastolic BP prior to groin puncture (Mean with SD) | 83.2 (15.0) | 77.5 (13.6) | 88.9 (19.3) | 86.1 (17.7) |

| <b>eTable 2. Details of post-endovascular treatment blood pressure management</b> |                            |                            |                            |                              |
|-----------------------------------------------------------------------------------|----------------------------|----------------------------|----------------------------|------------------------------|
|                                                                                   | SBP <140<br>mmHg<br>(n=40) | SBP <160<br>mmHg<br>(n=40) | SBP ≤180<br>mmHg<br>(n=40) | Overall<br>Cohort<br>(n=120) |
| Hourly post-EVT SBP (10th and 90th %tile)                                         | [103,139]                  | [108,153]                  | [103,157]                  | [104,150]                    |
| Hourly Avg post-EVT SBP (mean ±SD;<br>mmHg)                                       | 122 (15)                   | 130 (18)                   | 129 (20)                   | 127 (18)                     |
| Avg post-EVT DBP (mean ±SD; mmHg)                                                 | 66 (12)                    | 74 (15)                    | 75 (16)                    | 72 (15)                      |
| Any antihypertensive agent used post-EVT<br>(%)                                   | 29 (72.5%)                 | 22 (55%)                   | 10 (25%)                   | 61 (50.8%)                   |
| Proportion of time spent below target                                             | 85%                        | 92%                        | 99%                        | 92%                          |
| Type of anti-hypertensive(s) used                                                 |                            |                            |                            |                              |
| Nicardipine <sup>a</sup> (%)                                                      | 25/29<br>(86.2%)           | 17/22<br>(77.3%)           | 7/10 (70%)                 | 49/61<br>(80.3%)             |
| Labetalol (%)                                                                     | 3/29<br>(10.3%)            | 2/22<br>(9.1%)             | 1/10 (10%)                 | 6/61 (9.8%)                  |
| Hydralazine (%)                                                                   | 0/29 (0%)                  | 1/22<br>(4.5%)             | 1/10 (10%)                 | 2/61 (3.3%)                  |
| Metoprolol (%)                                                                    | 1/29 (3.4%)                | 1/22<br>(4.5%)             | 1/10 (10%)                 | 3/61(4.9%)                   |
| Carvedilol (%)                                                                    | 0/29(0%)                   | 1/22<br>(4.5%)             | 0/10(0%)                   | 1/61 (1.6%)                  |
| <sup>a</sup> Recommended as first line agent per trial protocol                   |                            |                            |                            |                              |

| <b>eTable 3. BP target modification information</b> |                                            |              |                                                                             |            |                                                     |            |                      |
|-----------------------------------------------------|--------------------------------------------|--------------|-----------------------------------------------------------------------------|------------|-----------------------------------------------------|------------|----------------------|
| <b>BP target modified</b>                           | <b>Lower target of &lt; 140mmHg (N=40)</b> |              | <b>Intermediate target of &lt; 160mmHg (N=40)</b>                           |            | <b>High target of &lt;=180mmHg (control) (N=40)</b> |            | <b>Total (N=120)</b> |
| Yes                                                 | 1 (2.5%)                                   |              | 1 (2.5%)                                                                    |            | 1 (2.5%)                                            |            | 3 (2.5%)             |
|                                                     | Reason                                     | New target   | Reason                                                                      | New target | Reason                                              | New target |                      |
|                                                     | Reocclusion of the ICA                     | 120-180 mmHg | Vessel injury and extravasation of contrast was noted on subsequent CT scan | <120 mmHg  | Large infarct and procedural considerations         | <140 mmHg  |                      |

| <b>eTable 4. Details of missing outcome data</b> |                                                        |
|--------------------------------------------------|--------------------------------------------------------|
| Final Infarct Volume                             |                                                        |
| Randomization group                              | Reason for missing outcome                             |
| <140                                             | Transitioned to comfort care before 36 +/-12 hours     |
| <140                                             | Uninterpretable imaging study                          |
| <160                                             | Uninterpretable imaging study                          |
| <160                                             | Imaging study unavailable                              |
| <160                                             | Transitioned to comfort care before 36 +/-12 hours     |
| <160                                             | Imaging study unavailable                              |
| <=180                                            | Uninterpretable imaging study                          |
| Utility-weighted modified Rankin score           |                                                        |
| <140                                             | Patient could not be reached despite multiple attempts |
| <140                                             | Patient could not be reached despite multiple attempts |
| <140                                             | Patient could not be reached despite multiple attempts |
| <160                                             | Patient could not be reached despite multiple attempts |
| <=180                                            | Patient could not be reached despite multiple attempts |
| <=180                                            | Patient could not be reached despite multiple attempts |
| <=180                                            | Patient could not be reached despite multiple attempts |



| <b>eTable 5. Details of hemorrhage grade by randomization group</b> |                         |                         |                         |
|---------------------------------------------------------------------|-------------------------|-------------------------|-------------------------|
|                                                                     | SBP <140<br>mmHg (n=14) | SBP <160<br>mmHg (n=12) | SBP ≤180<br>mmHg (n=12) |
| Hemorrhagic Infarct 1 (%)                                           | 1 (7.1%)                | 2 (16.7%)               | 4 (33.3%)               |
| Hemorrhagic Infarct 2 (%)                                           | 9 (64.3%)               | 5 (41.7%)               | 4 (33.3%)               |
| Parenchymal Hematoma 1 (%)                                          | 3 (21.4%)               | 1 (8.3%)                | 2 (16.7%)               |
| Parenchymal Hematoma 2 (%)                                          | 1 (7.1%)                | 4 (33.3%)               | 2 (16.7%)               |

| <b>eTable 6. Details of serious adverse events (SAE)</b> |                                                           |
|----------------------------------------------------------|-----------------------------------------------------------|
| Randomization group                                      | SAE Description MeDRA Term                                |
| </=180                                                   | Femoral artery Pseudoaneurysm                             |
| <160                                                     | Sepsis and cardiac failure                                |
| <160                                                     | Aspiration Pneumonia                                      |
| <160                                                     | Aspiration Pneumonia                                      |
| <140                                                     | Carotid artery re-occlusion                               |
| <140                                                     | Subarachnoid hemorrhage                                   |
| <140                                                     | Gastrointestinal hemorrhage associated with gastric ulcer |
| <140                                                     | New contralateral large vessel occlusion stroke           |

| <b>eTable 7. Subgroup analyses</b>               |             |                    |                    |         |
|--------------------------------------------------|-------------|--------------------|--------------------|---------|
|                                                  | Coefficient | 95% CI Lower Bound | 95% CI Upper Bound | P-value |
| <b>Final infarct volume outcome</b>              |             |                    |                    |         |
| Age                                              | 1.1986      | -11.215            | 13.612             | 0.8503  |
| Age (nonlinear)                                  | -14.417     | -30.784            | 1.95112            | 0.0874  |
| ASPECT score                                     | -24.233     | -80.812            | 32.3467            | 0.4032  |
| Modified Tan score                               | -69.511     | -223.79            | 84.7724            | 0.3835  |
| eTICI 2c                                         | -102.45     | -375.97            | 171.075            | 0.4646  |
| eTICI 3                                          | -25.826     | -238.56            | 186.907            | 0.8125  |
| Randomization                                    | -1.545      | -7.2083            | 4.11837            | 0.5941  |
| Age * Randomization                              | -0.0073     | -0.0863            | 0.0718             | 0.8576  |
| Age (non-linear) * Randomization                 | 0.0923      | -0.0136            | 0.19831            | 0.0907  |
| ASPECT score * Randomization                     | 0.1303      | -0.2182            | 0.4789             | 0.4653  |
| Modified Tan score * Randomization               | 0.2591      | -0.6777            | 1.19595            | 0.5911  |
| eTICI 2c * Randomization                         | 0.4301      | -1.2642            | 2.12435            | 0.6199  |
| eTICI 3 * Randomization                          | 0.0462      | -1.2578            | 1.35027            | 0.9448  |
| <b>Uw-mRS outcome</b>                            |             |                    |                    |         |
| Age                                              | -0.0904     | -0.18495           | 0.00423            | 0.0645  |
| Age (nonlinear)                                  | 0.1102      | -0.01481           | 0.23511            | 0.0877  |
| ASPECT Score                                     | 0.0447      | -0.38453           | 0.47396            | 0.8387  |
| Modified Tan Score on Baseline CTA               | 0.2087      | -0.8699            | 1.28737            | 0.706   |
| Final Recanalization Grade: 2c                   | -0.93       | -2.98567           | 1.12562            | 0.3776  |
| Final Recanalization Grade: 3                    | -0.6941     | -2.30185           | 0.91366            | 0.4004  |
| Randomization                                    | -0.0331     | -0.07504           | 0.00891            | 0.1259  |
| Age*Randomization                                | 0.0006      | -0.00005           | 0.00116            | 0.0742  |
| Age (non-linear) * Randomization                 | -0.0007     | -0.00155           | 0.00007            | 0.0756  |
| ASPECT Score*Randomization                       | -0.0001     | -0.00275           | 0.00256            | 0.9454  |
| Modified Tan Score on Baseline CTA*Randomization | -0.0006     | -0.00713           | 0.00602            | 0.8687  |
| Final Recanalization Grade: 2c*Randomization     | 0.0065      | -0.0062            | 0.01925            | 0.3175  |
| Final Recanalization Grade: 3*Randomization      | 0.005       | -0.00491           | 0.01494            | 0.3251  |

| <b>eTable 8. Predicted Probabilities of Success for Future Trials Comparing &lt;140 vs ≤180 mmHg and &lt;160 vs ≤180 Arms</b> |                  |                  |
|-------------------------------------------------------------------------------------------------------------------------------|------------------|------------------|
| Total N                                                                                                                       | PPOS             |                  |
|                                                                                                                               | <140 vs ≤180mmHg | <160 vs ≤180mmHg |
| 400                                                                                                                           | 16%              | 9%               |
| 800                                                                                                                           | 21%              | 12%              |
| 1500                                                                                                                          | 25%              | 14%              |
| 2000                                                                                                                          | 27%              | 16%              |
| 2400                                                                                                                          | 28%              | 17%              |

## Statistical Models

The primary statistical models and hypotheses are:

- $FIV = \text{intercept} + \beta_1 * \text{baseline ASPECT score} + \beta_2 * \text{study arm}$

H0: The coefficient of study group is less than or equal to 0.5.

H1: The coefficient of study group is greater than 0.5.

- $uw\_mRS = \text{intercept} + \beta_1 * \text{pre-stroke mRS} + \beta_2 * \text{study arm}$

H0: the coefficient of study arm is greater than or equal to -0.005.

H1: the coefficient of study arm is less than -0.005.
