# Supplementary material
Source: PubMed Central journal article supplement (PMC10481231)
Supplement: jama-e2314330-s003.pdf [file jama-e2314330-s003.pdf]

## Data Sharing Statement

Mistry. Blood Pressure Management After Endovascular Therapy for Acute Ischemic Stroke. *JAMA*. Published September 05, 2023. doi:10.1001/jama.2023.14330

### Data

**Data available:** Yes

**Data types:** Deidentified participant data

**How to access data:** The data will be shared on the NIH/NINDS central data repository per NIH rules.

**When available:** beginning date: 06-15-2023

### Supporting Documents

**Document types:** None

### Additional Information

**Who can access the data:** anyone requesting the data

**Types of analyses:** for a specified purpose

**Mechanisms of data availability:** after approval of a proposal by the NIH/NINDS
